# Supplementary material for: Apixaban compared with warfarin to prevent thrombosis in thrombotic antiphospholipid syndrome: a randomized trial
Source: PubMed Central journal article supplement — Blood Adv. 2022 Mar 14;6(6):1661–70. doi: 10.1182/bloodadvances.2021005808 (PMC8941474; doi:10.1182/bloodadvances.2021005808), 2022-03-14
Supplement: advancesADV2021005808-suppl1.pdf [file advancesADV2021005808-suppl1.pdf]

Supplemental Tables for Apixaban compared with warfarin to prevent thrombosis in thrombotic antiphospholipid syndrome: a randomized trial

Scott C. Woller MD<sup>1,2</sup>, Scott M. Stevens MD<sup>1,2</sup>, David Kaplan MD<sup>2</sup>, Tzu-Fei Wang MD<sup>3</sup>, D. Ware Branch<sup>4</sup>, Danielle Groat MS<sup>5</sup>, Emily L. Wilson MS<sup>5</sup>, Brent Armbruster BA<sup>5</sup>, Valerie T. Aston MBA<sup>5</sup>, James F. Lloyd BS<sup>4</sup>, Matthew T. Rondina MD<sup>2</sup>, C. Greg Elliott, MD<sup>1,2</sup>

**Supplement Table 1: Detailed patient characteristics with study outcomes**

| ID | Age | Sex    | BM I | Study Arm (dose, mg) | Clinical History                           | Antibody Positivity | APS Category | Outcome Event | Days to Event | Warfarin Days | Apixaban 2.5 mg BID Days | Apixaban 5.0 mg BID Days |
|----|-----|--------|------|----------------------|--------------------------------------------|---------------------|--------------|---------------|---------------|---------------|--------------------------|--------------------------|
| 1  | 43  | Female | 36.9 | Apixaban 2.5         | DVT                                        | Triple              | Definite     | Stroke        | 67            | 0             | 67                       | 0                        |
| 2  | 47  | Female | 19.4 | Apixaban 2.5         | Stroke, TIA, DVT, pregnancy loss           | Double              | Likely       | Stroke        | 37            | 0             | 37                       | 0                        |
| 3  | 69  | Female | 23.2 | Apixaban 2.5         | Stroke, pregnancy loss                     | N/A                 | Historical   | Stroke        | 6             | 0             | 6                        | 0                        |
| 4  | 51  | Female | 25.5 | Apixaban 2.5 & 5.0   | Stroke, other arterial thrombosis, DVT, PE | Triple              | Definite     | Stroke        | 316           | 0             | 234                      | 82                       |
| 5  | 40  | Female | 39.3 | Apixaban 2.5 & 5.0   | Stroke, DVT, PE, pregnancy loss            | Single              | Likely       | Stroke        | 156           | 0             | 123                      | 33                       |
| 6  | 66  | Male   | 39.3 | Apixaban 5.0         | DVT                                        | N/A                 | Historical   | Stroke        | 104           | 0             | 0                        | 104                      |
| 7  | 62  | Female | 30.5 | Warfarin             | Stroke, DVT, PE                            | N/A                 | Historical   | Major Bleed   | 319           | 319           | 0                        | 0                        |
| 8  | 60  | Male   | 38.9 | Apixaban 2.5 & 5.0   | DVT, PE                                    | Double              | Definite     | none          | -             | 0             | 204                      | 161                      |
| 9  | 29  | Female | 24.4 | Apixaban 2.5 & 5.0   | DVT, pregnancy loss                        | Double              | Definite     | none          | -             | 0             | 204                      | 161                      |
| 10 | 53  | Female | 22.4 | Apixaban 2.5 & 5.0   | DVT, PE                                    | Double              | Likely       | none          | -             | 0             | 183                      | 182                      |
| 11 | 47  | Female | 29.9 | Apixaban 2.5 & 5.0   | Stroke                                     | Single              | Likely       | none          | -             | 0             | 209                      | 156                      |
| 12 | 45  | Male   | 30.9 | Apixaban 2.5 & 5.0   | DVT, PE                                    | Single              | Likely       | none          | -             | 0             | 182                      | 183                      |
| 13 | 36  | Female | 20.5 | Apixaban 2.5 & 5.0   | PE                                         | Single              | Likely       | none          | -             | 0             | 154                      | 211                      |
| 14 | 47  | Female | 35.9 | Apixaban 2.5 & 5.0   | DVT, PE                                    | N/A                 | Historical   | none          | -             | 0             | 124                      | 241                      |

|    |    |        |      |                    |                             |        |            |      |   |     |    |     |
|----|----|--------|------|--------------------|-----------------------------|--------|------------|------|---|-----|----|-----|
| 15 | 36 | Male   | 49.6 | Apixaban 2.5 & 5.0 | DVT, PE                     | N/A    | Historical | none | - | 0   | 91 | 274 |
| 16 | 30 | Female | 46.5 | Apixaban 5.0       | DVT, PE                     | Triple | Definite   | none | - | 0   | 0  | 365 |
| 17 | 43 | Female | 27.7 | Apixaban 5.0       | PE, pregnancy loss          | Triple | Definite   | none | - | 0   | 0  | 365 |
| 18 | 45 | Female | 29.3 | Apixaban 5.0       | DVT, pregnancy loss         | Triple | Likely     | none | - | 0   | 0  | 365 |
| 19 | 44 | Female | 28.9 | Apixaban 5.0       | DVT                         | Triple | Definite   | none | - | 0   | 0  | 365 |
| 20 | 32 | Female | 25.7 | Apixaban 5.0       | DVT, pregnancy loss         | Triple | Definite   | none | - | 0   | 0  | 365 |
| 21 | 61 | Female | 27.1 | Apixaban 5.0       | DVT                         | Single | Likely     | none | - | 0   | 0  | 365 |
| 22 | 52 | Female | 27.6 | Apixaban 5.0       | MI                          | N/A    | Historical | none | - | 325 | 0  | 40  |
| 23 | 27 | Female | 38.8 | Apixaban 5.0       | DVT                         | N/A    | Historical | none | - | 0   | 0  | 365 |
| 24 | 56 | Female | 30.8 | Apixaban 5.0       | PE                          | N/A    | Historical | none | - | 0   | 0  | 365 |
| 25 | 60 | Female | 37.1 | Warfarin           | Stroke, TIA                 | Triple | Definite   | none | - | 365 | 0  | 0   |
| 26 | 20 | Male   | 29.8 | Warfarin           | DVT, PE                     | Triple | Definite   | none | - | 365 | 0  | 0   |
| 27 | 57 | Female | 33.4 | Warfarin           | Stroke, TIA, pregnancy loss | Triple | Definite   | none | - | 365 | 0  | 0   |
| 28 | 35 | Male   | 30.1 | Warfarin           | Other arterial thrombosis   | Triple | Definite   | none | - | 365 | 0  | 0   |
| 29 | 61 | Female | 31.6 | Warfarin           | MI, DVT, PE, pregnancy loss | Triple | Definite   | none | - | 365 | 0  | 0   |
| 30 | 34 | Female | 33.1 | Warfarin           | DVT                         | Triple | Likely     | none | - | 365 | 0  | 0   |
| 31 | 25 | Female | 44.6 | Warfarin           | DVT                         | Triple | Definite   | none | - | 365 | 0  | 0   |
| 32 | 47 | Female | 33.8 | Warfarin           | TIA, DVT                    | Double | Definite   | none | - | 365 | 0  | 0   |
| 33 | 42 | Female | 30.8 | Warfarin           | Stroke, TIA                 | Double | Definite   | none | - | 365 | 0  | 0   |
| 34 | 43 | Female | 26.2 | Warfarin           | DVT                         | Single | Definite   | none | - | 365 | 0  | 0   |
| 35 | 54 | Male   | 32.6 | Warfarin           | DVT, PE                     | Single | Definite   | none | - | 365 | 0  | 0   |
| 36 | 66 | Female | 31.2 | Warfarin           | PE                          | Single | Likely     | none | - | 365 | 0  | 0   |
| 37 | 41 | Female | 45.1 | Warfarin           | Stroke, pregnancy loss      | Single | Likely     | none | - | 365 | 0  | 0   |

|    |    |        |      |          |                                                |        |            |      |   |     |   |   |
|----|----|--------|------|----------|------------------------------------------------|--------|------------|------|---|-----|---|---|
| 38 | 42 | Female | 20.7 | Warfarin | Stroke, TIA                                    | Single | Likely     | none | - | 365 | 0 | 0 |
| 39 | 31 | Female | 26.1 | Warfarin | DVT                                            | Single | Definite   | none | - | 365 | 0 | 0 |
| 40 | 47 | Female | 37.5 | Warfarin | DVT                                            | Single | Definite   | none | - | 365 | 0 | 0 |
| 41 | 61 | Female | 28   | Warfarin | Stroke, TIA, pregnancy loss                    | N/A    | Historical | none | - | 365 | 0 | 0 |
| 42 | 55 | Female | 41   | Warfarin | DVT                                            | N/A    | Historical | none | - | 365 | 0 | 0 |
| 43 | 52 | Female | 22   | Warfarin | DVT                                            | N/A    | Historical | none | - | 365 | 0 | 0 |
| 44 | 70 | Female | 27.1 | Warfarin | DVT                                            | N/A    | Historical | none | - | 365 | 0 | 0 |
| 45 | 73 | Male   | 31.1 | Warfarin | Other arterial thrombosis, DVT, PE             | N/A    | Historical | none | - | 365 | 0 | 0 |
| 46 | 40 | Female | 35.9 | Warfarin | DVT, PE                                        | N/A    | Historical | none | - | 365 | 0 | 0 |
| 47 | 63 | Female | 36   | Warfarin | DVT                                            | N/A    | Historical | none | - | 365 | 0 | 0 |
| 48 | 32 | Female | 31.6 | Warfarin | Other arterial thrombosis, DVT, pregnancy loss | N/A    | Historical | none | - | 365 | 0 | 0 |

APS: antiphospholipid syndrome; BID: twice daily; BMI: body mass index; DVT: Deep vein thrombosis; MI: myocardial infarction; PE: pulmonary embolism; TIA: transient ischemic attack

\*Dose of apixaban the time of the outcome event

^Patients with APS where characterized as having *definite APS* defined as radiology verified thrombosis plus a qualifying laboratory result# *likely APS* was defined as radiology verified thrombosis plus at least 1 qualifying laboratory result; or *historical APS* was defined as a report of a qualifying thrombosis event along with a reported history of abnormal laboratory testing, but results were not available for confirmation

\$Derived from Sapporo Criteria: the presence of lupus anticoagulant or anticardiolipin IgG or IgM or anti- $\beta$ -2-glycoprotein-1 IgG or IgM >40 IgG phospholipid Units (GPL) or IgM Phospholipid Units (MPL) or > the 99th percentile, on 2 separate occasions at least 12 weeks apart

N/A: not applicable as patient with historical APS

**Supplemental Table 2: Unscheduled encounters and adverse outcomes during the study**

| Event type             | Apixaban, n | Warfarin, n |
|------------------------|-------------|-------------|
| Encounter type         |             |             |
| Emergency department   | 11          | 8           |
| Unplanned doctor visit | 10          | 10          |
| Outcome                |             |             |
| Nuisance bleeding*     | 1           | 2           |
| New cancer diagnosis   | 0           | 2           |
| Isolated distal DVT    | 1           | 0           |

\*Bleeding that did not meet criteria as a major or clinically relevant nonmajor bleed  
DVT: deep vein thrombosis

**Supplemental Table 3:** Details for each participant that experienced a thrombotic or major bleed event during the study

| Patient Study Identification      | 24                             | 16                                 | 12                    | 2                                     | 32                                  | 3                       | 27                      |
|-----------------------------------|--------------------------------|------------------------------------|-----------------------|---------------------------------------|-------------------------------------|-------------------------|-------------------------|
| <b>Demographic Information</b>    |                                |                                    |                       |                                       |                                     |                         |                         |
| Sex                               | Female                         | Female                             | Female                | Female                                | Male                                | Female                  | Female                  |
| Age                               | 40                             | 43                                 | 47                    | 51                                    | 66                                  | 69                      | 62                      |
| BMI                               | 39.3                           | 36.9                               | 19.4                  | 25.5                                  | 39.3                                | 23.2                    | 30.5                    |
| Treatment Level                   | Apixaban Single                | Apixaban Triple                    | Apixaban Double       | Apixaban Triple                       | -                                   | -                       | -                       |
| Type                              | Likely <sup>^</sup>            | Definite <sup>^</sup>              | Likely <sup>^</sup>   | Definite <sup>^</sup>                 | Historical <sup>^</sup>             | Historical <sup>^</sup> | Historical <sup>^</sup> |
| <b>Adverse Events</b>             |                                |                                    |                       |                                       |                                     |                         |                         |
| Outcome Event Type                | Stroke                         | Stroke                             | Stroke                | Stroke                                | Stroke                              | Stroke                  | Major Bleed             |
| Days to event                     | 156                            | 67                                 | 37                    | 316                                   | 104                                 | 6                       | 319                     |
| Stroke Distribution               | Right anterior frontal lacunar | Anterior and posterior, unilateral | Bilateral anterior    | Right frontal                         | Multifocal left frontal             | Right parietal          | -                       |
| Single v. Multiple Lesions on MRI | Single                         | Multiple                           | Multiple              | Single with multiple chronic infarcts | Multiple                            | Single                  | -                       |
| MRI DWI (Normal or Abnormal)      | Abnormal DWI                   | Abnormal DWI                       | Abnormal DWI          | Abnormal DWI                          | Abnormal DWI                        | Abnormal DWI            | -                       |
| Hemorrhage Present                | No                             | Yes T2W on MRI                     | No                    | No                                    | No                                  | No                      | -                       |
| TOAST Classification              | Undetermined etiology          | Undetermined etiology              | Undetermined etiology | Undetermined etiology                 | Cardioembolic (atrial fibrillation) | Undetermined etiology   | -                       |
| <b>Laboratory Diagnostics</b>     |                                |                                    |                       |                                       |                                     |                         |                         |
| Lupus Anticoagulant Detected      | X                              | X                                  | X                     |                                       |                                     |                         |                         |
| Anticardiolipin IgG positive*     |                                | X                                  | X                     | X                                     |                                     |                         |                         |

| Patient Study Identification             | 24 | 16 | 12 | 2 | 32 | 3 | 27 |
|------------------------------------------|----|----|----|---|----|---|----|
| Anticardiolipin IgM positive*            |    | X  |    | X |    |   |    |
| Anti-beta-2-Glycoprotein-1 IgG positive* |    | X  | X  | X |    |   |    |
| Anti-beta-2-Glycoprotein-1 IgM positive* |    | X  |    | X |    |   |    |
| Previous Thrombotic Events               | X  | X  | X  | X | X  | X | X  |
| Arterial Events                          | X  |    | X  | X |    | X | X  |
| Myocardial infarction                    |    |    |    |   |    |   |    |
| Stroke                                   | X  |    | X  | X |    | X | X  |
| Other                                    |    |    |    | X |    |   |    |
| Venous Events                            | X  | X  | X  | X | X  |   | X  |
| Deep vein thrombosis                     | X  | X  | X  | X | X  |   | X  |
| Pulmonary embolism                       | X  |    |    | X |    |   | X  |
| Pregnancy morbidity                      | X  |    | X  |   |    | X |    |
| Risk Factors                             |    |    |    |   |    |   |    |
| Smoking                                  | X  |    | X  |   |    |   |    |
| Hypertension                             |    | X  |    |   |    | X |    |
| Diabetes                                 |    |    |    |   |    |   |    |
| Dyslipidemia                             |    |    |    |   |    | X |    |
| Heritable thrombophilia                  |    |    |    | X |    |   | X  |
| Charlson comorbidity index               | 2  |    | 1  | 6 | 7  | 4 | 2  |
| Comorbidities                            |    |    |    |   |    |   |    |
| Systemic lupus erythematosus             |    |    |    |   |    |   |    |
| Autoimmune disease                       |    | X  |    | X |    |   |    |
| Depression/Anxiety                       |    |    | X  | X |    |   | X  |
| Migraine/Headache                        |    |    | X  | X |    |   | X  |
| GERD                                     |    | X  |    | X |    | X | X  |
| Reactive airway/COPD                     |    |    | X  |   |    |   |    |
| Chronic pain syndrome                    |    |    |    |   |    | X | X  |
| TIA/Stroke                               | X  |    |    |   |    |   |    |
| Medications                              |    |    |    |   |    |   |    |

| Patient Study Identification | 24 | 16 | 12 | 2 | 32 | 3 | 27 |
|------------------------------|----|----|----|---|----|---|----|
| Aspirin                      |    |    |    |   |    |   |    |
| Statin                       |    |    |    |   |    | X |    |
| Hydroxychloroquine           | X  | X  |    |   |    |   | X  |
| Other immunosuppressant      | X  | X  |    |   |    |   | X  |
| Antihypertensive             | X  | X  |    | X | X  |   |    |
| Calcium                      |    | X  |    | X |    |   |    |
| Vitamin D                    | X  | X  |    | X |    | X |    |
| Antidepressant/Anxiolytic    |    |    | X  |   |    | X |    |
| Prescription analgesic       |    | X  |    |   |    | X | X  |
| Other vitamin supplement     |    |    | X  | X |    | X |    |
| Diabetic medication          |    |    |    |   |    |   |    |
| Asthma/Reactive airway       |    |    | X  |   | X  |   |    |
| Oral Contraceptive           |    |    |    |   |    |   |    |

APS: antiphospholipid syndrome; COPD: chronic obstructive pulmonary disease; GERD: gastroesophageal reflux disease; SD: standard deviation; TIA: transient ischemic attack

MRI: magnetic resonance imaging

DWI: Diffusion weighted imaging

\*At the time of enrollment

^Patients with APS were characterized as having *definite APS* defined as radiologically verified thrombosis plus a qualifying laboratory result# *likely APS* was defined as radiologically verified thrombosis plus at least 1 qualifying laboratory result; or *historical APS* was defined as a report of a qualifying thrombosis event along with a reported history of abnormal laboratory testing, but results were not available for confirmation

#Derived from Sapporo Criteria: the presence of lupus anticoagulant or anticardiolipin IgG or IgM or anti-β-2-glycoprotein-1 IgG or IgM >40 IgG phospholipid Units (GPL) or IgM Phospholipid Units (MPL) or > the 99th percentile, on 2 separate occasions at least 12 weeks apart

Study Arm - Apixaban - Warfarin

Percentage alive without thrombolysis

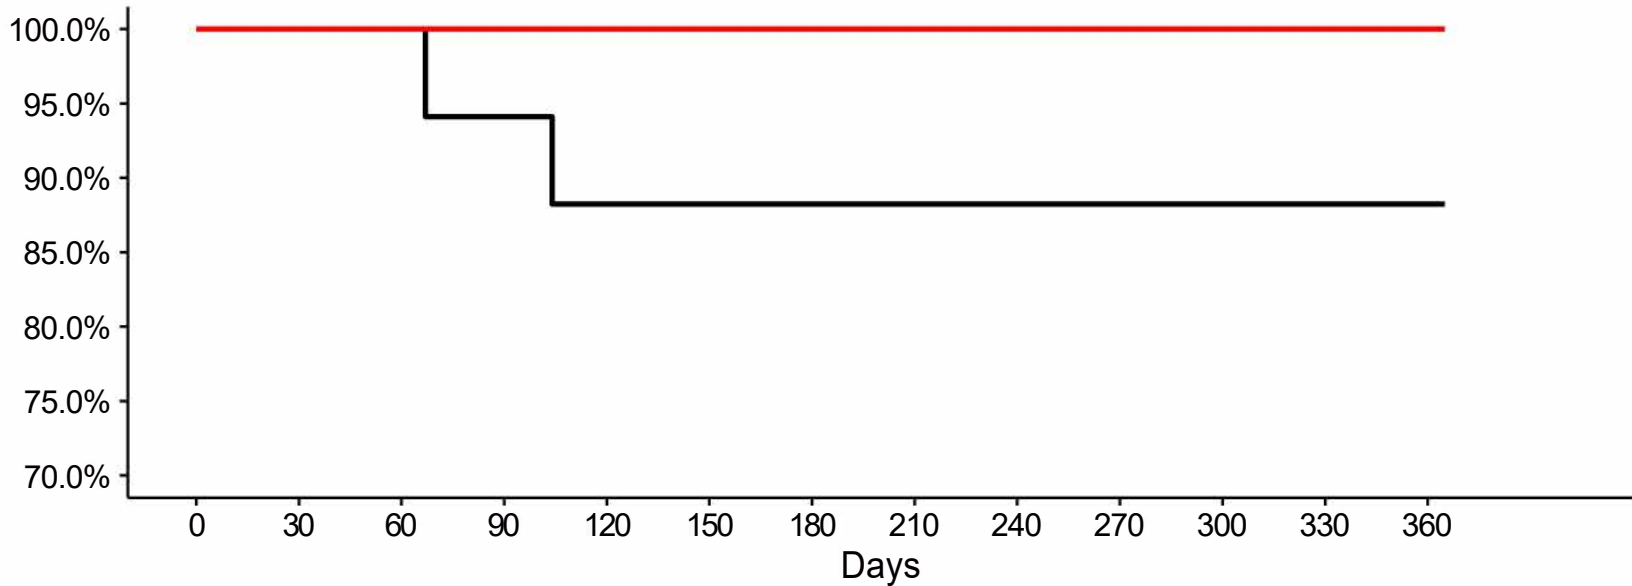

|          |    |    |     |     |     |     |     |
|----------|----|----|-----|-----|-----|-----|-----|
| Apixaban | 17 | 17 | 15  | 15  | 15  | 15  | 15  |
| Warfarin | 14 | 14 | 14  | 14  | 14  | 14  | 14  |
|          | 0  | 60 | 120 | 180 | 240 | 300 | 360 |

**Supplemental Figure 1: Kaplan–Meier cumulative event rate for major bleeding** The solid black line is for apixaban and solid red line is for warfarin.



patients alive without major bleeding

Study Arm — Apixaban — Warfarin

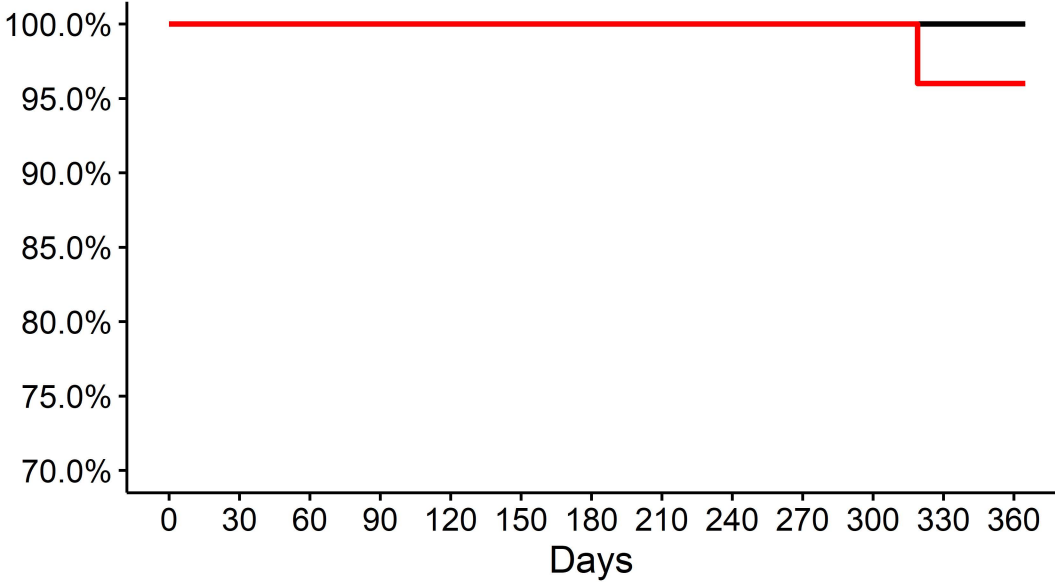

| Study Arm | 0  | 60 | 120 | 180 | 240 | 300 | 360 |
|-----------|----|----|-----|-----|-----|-----|-----|
| Apixaban  | 23 | 23 | 23  | 23  | 23  | 23  | 23  |
| Warfarin  | 25 | 25 | 25  | 25  | 25  | 25  | 24  |

**Supplemental Figure 2: Kaplan–Meier cumulative event rate of thrombosis and vascular death in the subgroup that did not have a history of arterial thrombosis.** This Kaplan-Meier figure represents the 1-year event rate of thrombosis outcome (stroke) among only subjects enrolled with no prior history of arterial thrombosis. The black and red lines display apixaban and warfarin; respectively.

patients alive without major bleeding

Study Arm — Apixaban — Warfarin

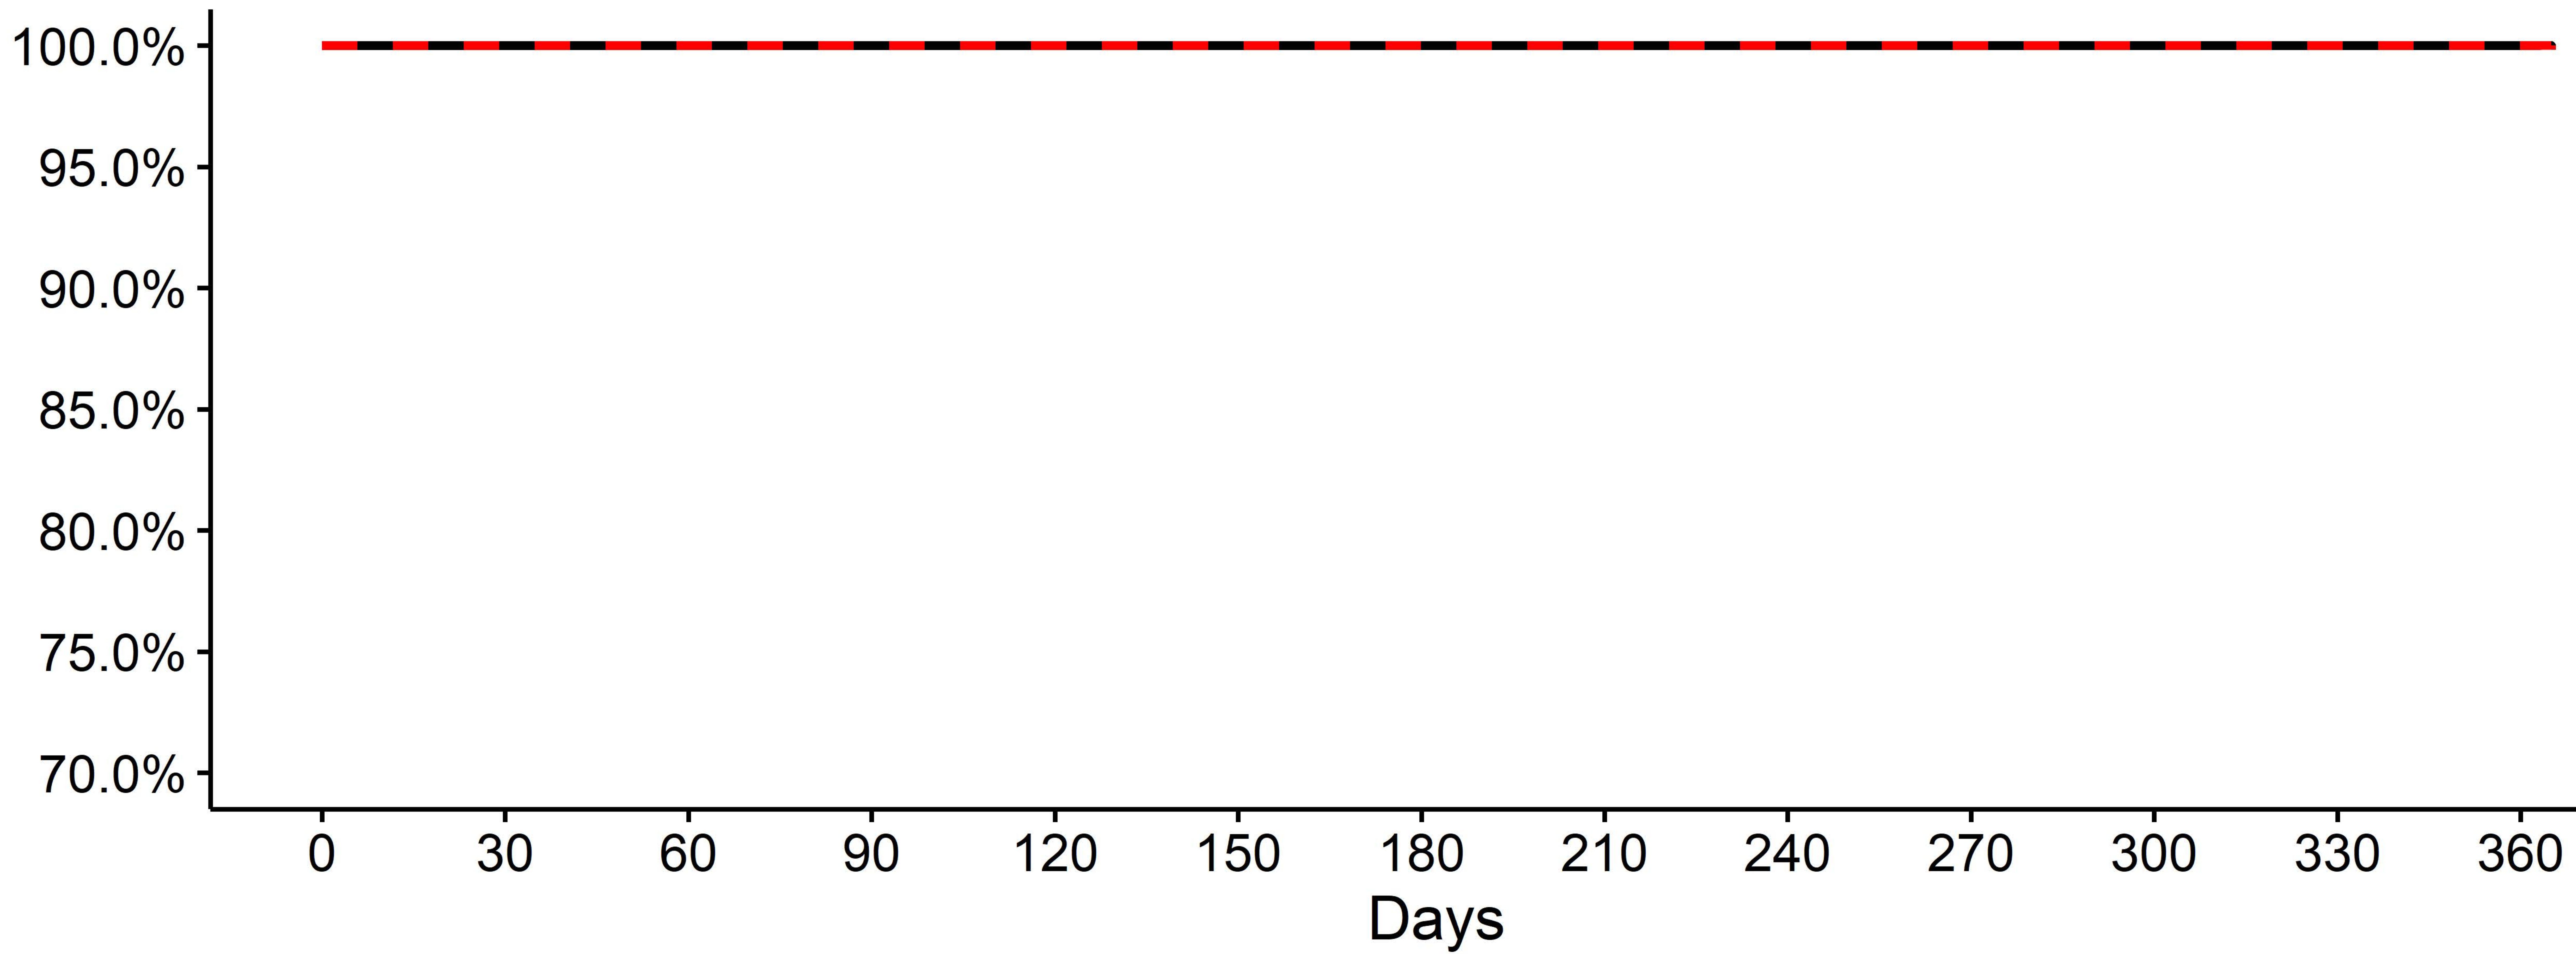

|          |    |    |     |     |     |     |     |
|----------|----|----|-----|-----|-----|-----|-----|
| Apixaban | 17 | 17 | 17  | 17  | 17  | 17  |     |
| Warfarin | 14 | 14 | 14  | 14  | 14  | 14  |     |
|          | 0  | 60 | 120 | 180 | 240 | 300 | 360 |

**Supplemental Figure 3: Kaplan–Meier cumulative event rate of major and clinically relevant non-major bleeding in the subgroup that did not have a history of arterial thrombosis.** This Kaplan-Meier figure represents the 1-year event rate of major bleeding outcome among only subjects enrolled with no prior history of arterial thrombosis. The black and red lines display apixaban and warfarin; respectively.
